# Supplementary material
Source: HighWire-hosted journal article supplement (https://injuryprevention.bmj.com/content/ip-2023-044905)
Supplement: inline-supplementary-material-1 [file inline-supplementary-material-1.pdf]

## Supplementary Appendix

### Table Of Contents

| <b>Page(s)</b> | <b>Description</b>                              |
|----------------|-------------------------------------------------|
| <b>1</b>       | <b>Table of Contents</b>                        |
| <b>2-7</b>     | <b>SA.1 Search Strategy</b>                     |
| <b>8</b>       | <b>SA.2 Inclusion and Exclusion Criteria</b>    |
| <b>9-33</b>    | <b>SA.3 Description of all included studies</b> |
| <b>34-35</b>   | <b>References for Supplementary Appendix</b>    |

## Appendix SA.1. Search Strategy

**PubMed**, 04/21/2022 – 4,667 results:

("Arm Injuries"[mh] OR "Athletic Injuries"[mh] OR "Back Injuries"[mh] OR "Bone and Bones/injuries"[mh] OR "Fractures, Bone"[mh] OR "Fractures, Cartilage"[mh] OR "Fractures, Multiple"[mh] OR "Hand Injuries"[mh] OR "Hip Injuries"[mh] OR "Joint Dislocations"[mh] OR "Leg Injuries"[mh] OR "Muscles/injuries"[mh] OR "Musculoskeletal System/injuries"[mh] OR "Neck Injuries"[mh] OR "Shoulder Injuries"[mh] OR "Spinal Cord Injuries"[mh] OR "Sprains and Strains"[mh] OR "Tendon Injuries"[mh] OR acl-injur\*[tiab] OR ankle-injur\*[tiab] OR arm-injur\*[tiab] OR athletic-injur\*[tiab] OR back-injur\*[tiab] OR back-pain[tiab] OR bone-injur\*[tiab] OR bone-stress-injur\*[tiab] OR cartilage-injur\*[tiab] OR finger-injur\*[tiab] OR foot-injur\*[tiab] OR fracture-injur\*[tiab] OR hamstring-injur\*[tiab] OR hand-injur\*[tiab] OR hip-injur\*[tiab] OR injury-mitigation[tiab] OR injury-prevention[tiab] OR injury-reduction[tiab] OR injury-risk\*[tiab] OR joint-injur\*[tiab] OR knee-injur\*[tiab] OR leg-injur\*[tiab] OR ligament-injur\*[tiab] OR limb-injur\*[tiab] OR muscle-injur\*[tiab] OR musculoskeletal-disorder\*[tiab] OR musculoskeletal-injur\*[tiab] OR neck-injur\*[tiab] OR overuse-injur\*[tiab] OR preventable-injur\*[tiab] OR reconditioning-program\*[tiab] OR rotator-cuff-injur\*[tiab] OR shoulder-injur\*[tiab] OR skeletal-injur\*[tiab] OR spinal-cord-injur\*[tiab] OR spinal-injur\*[tiab] OR spine-injur\*[tiab] OR tendon-injur\*[tiab] OR wrist-injur\*[tiab] OR (injur\*[ti] AND ("Risk Factors"[mh] OR mitigation[ti] OR prevention[ti] OR preventable[ti] OR risk\*[ti])) OR (assessment[tiab] AND recruit[tiab] AND motivation [tiab] AND strength[tiab])) AND ("Military Personnel" OR active-duty[tiab] OR airman[tiab] OR airmen[tiab] OR air-force[tiab] OR armed-forces[tiab] OR army[tiab] OR corpsman[tiab] OR corpsmen[tiab] OR defense-force\*[tiab] OR defence-force\*[tiab] OR flight-crew\*[tiab] OR infantr\*[tiab] OR marine-

corps[tiab] OR marines[tiab] OR military[tiab] OR national-guard[tiab] OR naval[tiab] OR navy[tiab] OR reservist\*[tiab] OR sailor[tiab] OR sailors[tiab] OR security-forces[tiab] OR service-member\*[tiab] OR servicemember\*[tiab] OR service-wom\*[tiab] OR servicewomen[tiab] OR servicewoman[tiab] OR special-forces[tiab] OR special-operations[tiab] OR soldier[tiab] OR soldiers[tiab] OR submarine\*[tiab] OR triccare[tiab] OR troops[tiab] OR uniformed-services[tiab]) AND english[lang]

**Embase**, 04/21/2022 – 5,731 results:

1. ('limb injury'/exp OR 'musculoskeletal injury'/exp OR 'sport injury'/exp OR ('bone'/exp AND 'prevention'/exp) OR ('musculoskeletal system'/exp AND 'prevention'/exp) OR (acl-injur\* OR ankle-injur\* OR arm-injur\* OR athletic-injur\* OR back-injur\* OR back-pain OR bone-injur\* OR bone-stress-injur\* OR cartilage-injur\* OR finger-injur\* OR foot-injur\* OR fracture-injur\* OR hamstring-injur\* OR hand-injur\* OR hip-injur\* OR injury-mitigation OR injury-prevention OR injury-reduction OR injury-risk\* OR joint-injur\* OR knee-injur\* OR leg-injur\* OR ligament-injur\* OR limb-injur\* OR muscle-injur\* OR musculoskeletal-disorder\* OR musculoskeletal-injur\* OR neck-injur\* OR overuse-injur\* OR preventable-injur\* OR reconditioning-program\* OR rotator-cuff-injur\* OR shoulder-injur\* OR skeletal-injur\* OR spinal-cord-injur\* OR spinal-injur\* OR spine-injur\* OR tendon-injur\* OR wrist-injur\*):ab,ti)
2. (injur\*:ti AND ('risk factor'/exp OR (mitigation OR prevention OR preventable OR risk\*):ti))
3. (assessment AND recruit AND motivation AND strength):ab,ti
4. #1 OR #2 OR #3

5. ('army'/exp OR 'air force'/exp OR 'military deployment'/exp OR 'military health'/de OR (active-duty OR airman OR airmen OR air-force OR armed-forces OR army OR corpsman OR corpsmen OR defense-force\* OR defence-force\* OR flight-crew\* OR infantr\* OR marine-corps OR marines OR military OR national-guard OR naval OR navy OR reservist\* OR sailor OR sailors OR security-forces OR service-member\* OR servicemember\* OR service-wom\* OR servicewomen OR servicewoman OR special-forces OR special-operations OR soldier OR soldiers OR submarine\* OR tricare OR troops OR uniformed-services):ab,ti)

6. #4 AND #5 AND english[lang])

**CINAHL**, 04/21/2022 – 3,526 results:

1. (MH "Arm Injuries+" OR MH "Athletic Injuries+" OR MH "Back Injuries+" OR MH "Fractures+" OR MH "Hand Injuries+" OR MH "Leg Injuries+" OR MH "Ligament Injuries+" OR MH "Neck Injuries+" OR MH "Spinal Cord Injuries+" OR MH "Spinal Injuries+" OR MH "Sprains and Strains+" OR MH "Tendon Injuries+" OR MH "Musculoskeletal System+" OR MH "Musculoskeletal Diseases+/PC" OR acl-injur\* OR ankle-injur\* OR arm-injur\* OR athletic-injur\* OR back-injur\* OR back-pain OR bone-injur\* OR bone-stress-injur\* OR cartilage-injur\* OR finger-injur\* OR foot-injur\* OR fracture-injur\* OR hamstring-injur\* OR hand-injur\* OR hip-injur\* OR injury-mitigation OR injury-prevention OR injury-reduction OR injury-risk\* OR joint-injur\* OR knee-injur\* OR leg-injur\* OR ligament-injur\* OR limb-injur\* OR muscle-injur\* OR musculoskeletal-disorder\* OR musculoskeletal-injur\* OR neck-injur\* OR overuse-injur\* OR preventable-injur\* OR reconditioning-program\* OR rotator-cuff-injur\* OR shoulder-

injur\* OR skeletal-injur\* OR spinal-cord-injur\* OR spinal-injur\* OR spine-injur\* OR tendon-injur\* OR wrist-injur\*)

2. TI (injur\*) AND (MH "Risk Factors" OR TI (mitigation OR prevention OR preventable OR risk\*))

3. (assessment AND recruit AND motivation AND strength)

4. #1 OR #2 OR #3

5. (MH "Military Personnel+" OR MH "Military Deployment+" OR MH "Military Health" OR MH "Military Training" OR active-duty OR airman OR airmen OR air-force OR armed-forces OR army OR corpsman OR corpsmen OR defense-force\* OR defence-force\* OR flight-crew\* OR infantr\* OR marine-corps OR marines OR military OR national-guard OR naval OR navy OR reservist\* OR sailor OR sailors OR security-forces OR service-member\* OR servicemember\* OR service-wom\* OR servicewomen OR servicewoman OR special-forces OR special-operations OR soldier OR soldiers OR submarine\* OR tricore OR troops OR uniformed-services)

6. #4 AND #5

- Limiters: English Language

All Ovid EBM Reviews (Cochrane), 04/21/2022 – 282 results:

1. (acl-injur\* OR ankle-injur\* OR arm-injur\* OR athletic-injur\* OR back-injur\* OR back-pain OR bone-injur\* OR bone-stress-injur\* OR cartilage-injur\* OR finger-injur\* OR foot-injur\* OR fracture-injur\* OR hamstring-injur\* OR hand-injur\* OR hip-injur\* OR injury-mitigation OR

injury-prevention OR injury-reduction OR injury-risk\* OR joint-injur\* OR knee-injur\* OR leg-injur\* OR ligament-injur\* OR limb-injur\* OR muscle-injur\* OR musculoskeletal-disorder\* OR musculoskeletal-injur\* OR neck-injur\* OR overuse-injur\* OR preventable-injur\* OR reconditioning-program\* OR rotator-cuff-injur\* OR shoulder-injur\* OR skeletal-injur\* OR spinal-cord-injur\* OR spinal-injur\* OR spine-injur\* OR tendon-injur\* OR wrist-injur\*).ab,ti.

2. (injur\* AND (mitigation OR prevention OR preventable OR risk\*)).ti.

3. (assessment AND recruit AND motivation AND strength).ab,ti.

4. 1 OR 2 OR 3

5. (active-duty OR airman OR airmen OR air-force OR armed-forces OR army OR corpsman OR corporsman OR defense-force\* OR defence-force\* OR flight-crew\* OR infantr\* OR marine-corps OR marines OR military OR national-guard OR naval OR navy OR reservist\* OR sailor OR sailors OR security-forces OR service-member\* OR servicemember\* OR service-wom\* OR servicewomen OR servicewoman OR special-forces OR special-operations OR soldier OR soldiers OR submarine\* OR tricore OR troops OR uniformed-services).ab,ti.

6. 4 and 5

7. limit 6 to english language

**Web of Science**, 04/21/2022 – 2,555 results:

1. TS=(acl-injur\* OR ankle-injur\* OR arm-injur\* OR athletic-injur\* OR back-injur\* OR back-pain OR bone-injur\* OR bone-stress-injur\* OR cartilage-injur\* OR finger-injur\* OR foot-injur\* OR fracture-injur\* OR hamstring-injur\* OR hand-injur\* OR hip-injur\* OR injury-mitigation OR

injury-prevention OR injury-reduction OR injury-risk\* OR joint-injur\* OR knee-injur\* OR leg-injur\* OR ligament-injur\* OR limb-injur\* OR muscle-injur\* OR musculoskeletal-disorder\* OR musculoskeletal-injur\* OR neck-injur\* OR overuse-injur\* OR preventable-injur\* OR reconditioning-program\* OR rotator-cuff-injur\* OR shoulder-injur\* OR skeletal-injur\* OR spinal-cord-injur\* OR spinal-injur\* OR spine-injur\* OR tendon-injur\* OR wrist-injur\*)

2. TI=(injur\* AND (mitigation OR prevention OR preventable OR risk\*))

3. TS=(assessment AND recruit AND motivation AND strength)

4. 1 OR 2 OR 3

5. TS=(active-duty OR airman OR airmen OR air-force OR armed-forces OR army OR corpsman OR corporsman OR defense-force\* OR defence-force\* OR flight-crew\* OR infantr\* OR marine-corps OR marines OR military OR national-guard OR naval OR navy OR reservist\* OR sailor OR sailors OR security-forces OR service-member\* OR servicemember\* OR service-wom\* OR servicewomen OR servicewoman OR special-forces OR special-operations OR soldier OR soldiers OR submarine\* OR tricare OR troops OR uniformed-services)

6. 4 and 5

7. limit 6 to English language

Defense Technical Information Center (DTIC) Archives [&Theses/Dissertations](#), 04/21/2022 –

106 results

(injury OR musculoskeletal)

**Table SA.2. Article Inclusion and Exclusion Criteria**

| Inclusion Criterion                                                                                                                                                                                                                                                                                                                                                                                                                                                                                                                                  | Exclusion Criterion                                                                                                                                                                                                                                                                                                                                                                                                                                                                                                                                                                                                                                                                                                                                                                                                                                                                  |
|------------------------------------------------------------------------------------------------------------------------------------------------------------------------------------------------------------------------------------------------------------------------------------------------------------------------------------------------------------------------------------------------------------------------------------------------------------------------------------------------------------------------------------------------------|--------------------------------------------------------------------------------------------------------------------------------------------------------------------------------------------------------------------------------------------------------------------------------------------------------------------------------------------------------------------------------------------------------------------------------------------------------------------------------------------------------------------------------------------------------------------------------------------------------------------------------------------------------------------------------------------------------------------------------------------------------------------------------------------------------------------------------------------------------------------------------------|
| <ul style="list-style-type: none"> <li>• Implemented and/or assessed an MSK-IMPP targeting military service members.</li> <li>• Primary* or secondary† MSK-I prevention</li> <li>• Assessed military MSK-IMPP implementation, effectiveness, and/or efficacy.</li> <li>• Primary research studies, reviews, meta-analyses, guidelines or grey literature (including government reports, unpublished and ongoing trials, annual reports, dissertations and conference abstracts).</li> <li>• Human studies</li> <li>• Published in English</li> </ul> | <ul style="list-style-type: none"> <li>• Did not implement or assess an MSK-IMPP (e.g.: Individual MSK-I risk factor association or odds studies, development of MSK-I prediction models).</li> <li>• Did not include military service members, or assessed MSK-IMPP targeting a mixture of military service members and other populations without specifically delineating military service member findings.</li> <li>• Assessed MSK-I caused by traumatic motor vehicle/cycle collisions, slips, trips, falls, or combat-related injuries.</li> <li>• Only assessed blister outcomes</li> <li>• Only assessed concussion/traumatic brain injury outcomes</li> <li>• Assessed only tertiary‡ MSK-I prevention</li> <li>• Cadaveric or in situ model studies</li> <li>• Case reports, editorials, periodicals and letters to the editor</li> <li>• Only involved veterans</li> </ul> |

MSK = Musculoskeletal; MSK-I = Musculoskeletal Injury; MSK-IMPP = Musculoskeletal Injury Mitigation and Prevention Program

Notes:

\* Primary injury prevention was defined as any intervention or measure that was introduced to reduce the risk of sustaining an initial MSK-I.<sup>1-3</sup>

† Secondary injury prevention was defined as any intervention or measure that was introduced to reduce the risk of sustaining a new or recurrent MSK-I after an initial MSK-I.<sup>1,2</sup>

‡ Tertiary injury prevention was defined as any intervention or measure that was introduced to reduce or eliminate long-term impairment and disabilities after an initial MSK-I, and to promote adjustment to implications from injury.<sup>3</sup>



**Appendix SA.3. Description of all included studies**

| First Author           | Year | Study Design                | Sex    | Country       | Military Branch   | Injury Prevention Program            | Barriers to Implementation      | Facilitators to Implementation                                      |
|------------------------|------|-----------------------------|--------|---------------|-------------------|--------------------------------------|---------------------------------|---------------------------------------------------------------------|
| Aaltonen <sup>4</sup>  | 2007 | Systematic Review           |        | Finland       | Multiple Branches | NA                                   | - Limited Resources             |                                                                     |
| Alricsson <sup>5</sup> | 2004 | Prospective Cohort          | Male   | Sweden        | Air Force         | Adding an Exercise Intervention      | - Competing Military Priorities | - Involvement/Proximity of Experts<br>- Targeted Design of MSK-IMPP |
| Amako <sup>6</sup>     | 2003 | Prospective Cohort          | Male   | Japan         | Army              | Adding an Exercise Intervention      |                                 | - Low Burden on Resources<br>- Strong Stakeholder Engagement        |
| Amoroso <sup>7</sup>   | 1998 | Prospective Cohort          | Male   | United States | Army              | Equipment                            | - Equipment-Related Factors     | - Involvement/Proximity of Experts                                  |
| Andersen <sup>8</sup>  | 2016 | Narrative Review            |        | United States | Multiple Branches | NA                                   |                                 |                                                                     |
| Äng <sup>9</sup>       | 2009 | Randomized Controlled Trial | Male   | Sweden        | Air Force         | Adding an Exercise Intervention      |                                 | - Proximity and Continued Engagement with MSK-IMPP Experts          |
| Aronen <sup>10</sup>   | 1984 | Quasi-Experimental          | Male   | United States | Navy              | Post-Injury Treatment/Rehabilitation |                                 |                                                                     |
| Arslan <sup>11</sup>   | 2021 | Systematic Review           |        | Netherlands   | Multiple Branches | NA                                   |                                 |                                                                     |
| Barnes <sup>12</sup>   | 2015 | Randomized Controlled Trial | Female | United States | Air Force         | Nutrition/Supplementation            | -Lack of Stakeholder Engagement | - Low Burden on Resources                                           |
| Baxter <sup>13</sup>   | 2011 | Quasi-Experimental          | Male   | New Zealand   | Multiple Branches | Equipment                            |                                 | - Low Burden on Resources                                           |

|                         |      |                             |                 |                |                   |                                                                                    |                                                                                            |                                                                                                                                               |
|-------------------------|------|-----------------------------|-----------------|----------------|-------------------|------------------------------------------------------------------------------------|--------------------------------------------------------------------------------------------|-----------------------------------------------------------------------------------------------------------------------------------------------|
| Baxter <sup>14</sup>    | 2012 | Systematic Review           |                 |                | Multiple Branches | NA                                                                                 |                                                                                            |                                                                                                                                               |
| Berg Rice <sup>15</sup> | 2002 | Mixed Methods               | Male            | United States  | Army              | Data-Driven Approach                                                               | - Competing Military Priorities<br>- Lack of Stakeholder Engagement<br>- Limited Resources | - Strong Stakeholder Engagement                                                                                                               |
| Berg Rice <sup>16</sup> | 2007 | Prospective Cohort          | Male            | United States  | Army              | Pre-Training MSK-I Symptom Screening and Referral                                  | - Limited Resources                                                                        |                                                                                                                                               |
| Bonanno <sup>17</sup>   | 2018 | Randomized Controlled Trial | Male/<br>Female | Australia      | Navy              | Equipment                                                                          |                                                                                            | - Low Burden on Resources                                                                                                                     |
| Brushoj <sup>18</sup>   | 2008 | Randomized Controlled Trial | Male            | Denmark        | Army              | Adding an Exercise Intervention                                                    | - Competing Military Priorities<br>- Lack of Stakeholder Engagement<br>- Limited Resources | - Providing Injury Mitigation Education<br>- Emphasizing End-User Acceptability<br>- Low Burden on Resources<br>- Targeted Design of MSK-IMPP |
| Bullock <sup>19</sup>   | 2010 | Systematic Review           |                 | United States  | Multiple Branches | NA                                                                                 | - Equipment-Related Factors<br>- Limited Resources                                         |                                                                                                                                               |
| Burgess <sup>20</sup>   | 1998 | Retrospective Cohort        | Male            | United Kingdom | Army              | Combination: Equipment, Modified Existing Physical Training, Nutrition/Supplements | -Competing military priorities                                                             | - Targeted Design of MSK-IMPP<br>-Strong stakeholder engagement                                                                               |

|                           |      |                             |                 |                |                   |                                      |                     |                                                                               |
|---------------------------|------|-----------------------------|-----------------|----------------|-------------------|--------------------------------------|---------------------|-------------------------------------------------------------------------------|
| Cameron <sup>21</sup>     | 2014 | Narrative Review            |                 | United States  | Multiple Branches | NA                                   |                     | - Involvement/Proximity of Experts                                            |
| Cancelliere <sup>22</sup> | 2019 | Systematic Scoping Review   |                 | Canada         | Multiple Branches | NA                                   |                     | - Providing Injury Mitigation Education<br>- Involvement/Proximity of Experts |
| Carow <sup>23</sup>       | 2016 | Randomized Controlled Trial | Male            | United States  | Army              | Adding an Exercise Intervention      |                     | - Involvement/Proximity of Experts                                            |
| Chalupa <sup>24</sup>     | 2016 | Narrative Review            |                 | United States  | Army              | NA                                   |                     |                                                                               |
| Childs <sup>25</sup>      | 2010 | Randomized Controlled Trial | Male/<br>Female | United States  | Army              | Adding an Exercise Intervention      |                     | - Providing Injury Mitigation Education<br>- Targeted Design of MSK-IMPP      |
| Childs <sup>26</sup>      | 2014 | Randomized Controlled Trial | Male/<br>Female | United States  | Army              | Education                            |                     | - Low Burden on Resources                                                     |
| Coakwell <sup>27</sup>    | 2004 | Narrative Review            |                 | United States  | Multiple Branches | NA                                   | - Limited Resources |                                                                               |
| Constantini <sup>28</sup> | 2010 | Prospective Cohort          | Female          | Israel         | Border Police     | Equipment                            |                     | - Strong Stakeholder Engagement                                               |
| Coppack <sup>29</sup>     | 2011 | Randomized Controlled Trial | Male/<br>Female | United Kingdom | Army              | Adding an Exercise Intervention      |                     | - Low Burden on Resources<br>- Strong Stakeholder Engagement                  |
| Dawson <sup>30</sup>      | 2015 | Quasi-Experimental          | Male            | Australia      | Army              | Modifying Existing Physical Training |                     |                                                                               |

|                               |      |                             |                 |                |                   |                                               |                                                    |                                                                               |
|-------------------------------|------|-----------------------------|-----------------|----------------|-------------------|-----------------------------------------------|----------------------------------------------------|-------------------------------------------------------------------------------|
| Dettori <sup>31</sup>         | 1995 | Randomized Controlled Trial | Male            | United States  | Army              | Adding an Exercise Intervention               | -Competing military priorities                     |                                                                               |
| Dijkma <sup>32</sup>          | 2019 | Randomized Controlled Trial | Male            | Netherlands    | Air Force         | Adding an Exercise Intervention               |                                                    |                                                                               |
| Dijkma <sup>33</sup>          | 2020 | Randomized Controlled Trial | Male            | Netherlands    | Army              | Adding an Exercise Intervention               | - Competing Military Priorities                    | - Emphasizing End-User Acceptability                                          |
| Dijkma <sup>34</sup>          | 2020 | Systematic Review           |                 | Netherlands    | Multiple Branches | NA                                            | -Competing military priorities                     |                                                                               |
| Esterman <sup>35</sup>        | 2005 | Randomized Controlled Trial | Male            | Australia      | Air Force         | Equipment                                     | - Equipment-Related Factors                        |                                                                               |
| Finestone <sup>36</sup>       | 1992 | Randomized Controlled Trial | Male            | Israel         | Army              | Equipment                                     | - Equipment-Related Factors                        |                                                                               |
| Finestone <sup>37</sup>       | 1999 | Quasi-Experimental          | Male            | Israel         | Army              | Equipment                                     | - Equipment-Related Factors                        |                                                                               |
| Finestone <sup>38</sup>       | 2004 | Randomized Controlled Trial | Male            | Israel         | Army              | Equipment                                     | - Equipment-Related Factors                        |                                                                               |
| Finestone <sup>39</sup>       | 2008 | Narrative Review            | Male            | Israel         | Army              | NA                                            |                                                    |                                                                               |
| Fisher <sup>40</sup>          | 2021 | Randomized Controlled Trial | Male/<br>Female | United States  | Air Force         | Embedding Medical Personnel                   |                                                    | - Providing Injury Mitigation Education<br>- Involvement/Proximity of Experts |
| Franklyn-Miller <sup>41</sup> | 2011 | Randomized Controlled Trial | Male/<br>Female | United Kingdom | Navy              | Equipment                                     |                                                    |                                                                               |
| Gardner <sup>42</sup>         | 1988 | Randomized Controlled Trial | Male            | United States  | Marines           | Equipment                                     |                                                    |                                                                               |
| George <sup>43</sup>          | 2011 | Randomized Controlled Trial | Male/<br>Female | United States  | Army              | Combination: Exercise Intervention, Education |                                                    | - Strong Stakeholder Engagement                                               |
| Gillespie <sup>44</sup>       | 2000 | Narrative Review            |                 | New Zealand    | Multiple Branches | NA                                            | - Equipment-Related Factors<br>- Limited Resources | - Involvement/Proximity of Experts                                            |

|                         |      |                                     |                 |                |                   |                                                                                  |                                                                     |                                                                                               |
|-------------------------|------|-------------------------------------|-----------------|----------------|-------------------|----------------------------------------------------------------------------------|---------------------------------------------------------------------|-----------------------------------------------------------------------------------------------|
| Goodall <sup>45</sup>   | 2013 | Randomized Controlled Trial         | Male/<br>Female | Australia      | Army              | Adding an Exercise Intervention                                                  |                                                                     | - Low Burden on Resources                                                                     |
| Grier <sup>46</sup>     | 2011 | Prospective Cohort Study            | Male/<br>Female | United States  | Army              | Equipment                                                                        |                                                                     |                                                                                               |
| Grier <sup>47</sup>     | 2018 | Cross-sectional                     | Male            | United States  | Army              | Combination:<br>Embedding Medical Personnel, Modified Existing Physical Training |                                                                     | - Involvement/Proximity of Experts                                                            |
| Gross <sup>48</sup>     | 2003 | Narrative Review                    |                 | United States  | Army              | NA                                                                               | - Equipment-Related Factors                                         | - Emphasizing End-User Acceptability                                                          |
| Hartig <sup>49</sup>    | 1999 | Prospective Cohort                  | Male            | United States  | Army              | Adding an Exercise Intervention                                                  | - Competing Military Priorities<br>- Lack of Stakeholder Engagement | - Low Burden on Resources<br>- Strong Stakeholder Engagement<br>- Targeted Design of MSK-IMPP |
| Heard <sup>50</sup>     | 2020 | Quasi-Experimental                  | Male            | United States  | Army              | Adding an Exercise Intervention                                                  | -Competing military priorities                                      |                                                                                               |
| Herbert <sup>51</sup>   | 2002 | Systematic Review and Meta-analysis |                 | Australia      | Army              | NA                                                                               |                                                                     |                                                                                               |
| Herman <sup>52</sup>    | 2012 | Systematic Review                   |                 | United Kingdom | Army              | NA                                                                               |                                                                     |                                                                                               |
| Herman <sup>53</sup>    | 2012 | Systematic Review                   |                 | Denmark        | Army              | NA                                                                               |                                                                     |                                                                                               |
| Hesarikia <sup>54</sup> | 2014 | Randomized Controlled Trial         | Male            | Iran           | Army              | Equipment                                                                        |                                                                     |                                                                                               |
| House <sup>55</sup>     | 2013 | Prospective Cohort Study            | Male            | United Kingdom | Marines           | Equipment                                                                        |                                                                     | - Strong Stakeholder Engagement                                                               |
| Jones <sup>56</sup>     | 1999 | Narrative Review                    |                 | United States  | Multiple Branches | NA                                                                               | - Limited Resources                                                 |                                                                                               |
| Jones <sup>57</sup>     | 2002 | Systematic Review                   |                 | United States  | Multiple Branches | NA                                                                               | -Equipment-Related Factors                                          |                                                                                               |
| Jones <sup>58</sup>     | 2015 | Narrative Review                    |                 | United States  | Army              | NA                                                                               |                                                                     |                                                                                               |
| Knapik <sup>59</sup>    | 2002 | Retrospective Cohort                | Male/<br>Female | United States  | Army              | Education                                                                        |                                                                     | - Strong Stakeholder Engagement                                                               |

|                      |      |                                     |                 |               |                   |                                                             |                                                    |                                         |
|----------------------|------|-------------------------------------|-----------------|---------------|-------------------|-------------------------------------------------------------|----------------------------------------------------|-----------------------------------------|
|                      |      |                                     |                 |               |                   |                                                             |                                                    | - Targeted Design of MSK-IMPP           |
| Knapik <sup>60</sup> | 2003 | Retrospective Cohort                | Male/<br>Female | United States | Army              | Modifying Existing Physical Training                        |                                                    | - Targeted Design of MSK-IMPP           |
| Knapik <sup>61</sup> | 2004 | Quasi-Experimental                  | Male/<br>Female | United States | Army              | Combination: Modified Existing Physical Training, Education | - Lack of Stakeholder Engagement                   | - Involvement/Proximity of Experts      |
| Knapik <sup>62</sup> | 2005 | Quasi-Experimental                  | Male/<br>Female | United States | Army              | Modifying Existing Physical Training                        | - Limited Resources                                | - Targeted Design of MSK-IMPP           |
| Knapik <sup>63</sup> | 2006 | Prospective Cohort                  | Male/<br>Female | United States | Army              | Adding an Exercise Intervention                             |                                                    | - Strong Stakeholder Engagement         |
| Knapik <sup>64</sup> | 2008 | Cross-sectional                     | Male            | United States | Army              | Equipment                                                   | - Equipment-Related Factors                        |                                         |
| Knapik <sup>65</sup> | 2009 | Randomized Controlled Trial         | Male/<br>Female | United States | Army              | Equipment                                                   | - Equipment-Related Factors<br>- Limited Resources |                                         |
| Knapik <sup>66</sup> | 2009 | Narrative Review                    |                 | United States | Army              | NA                                                          | - Limited Resources                                | - Providing Injury Mitigation Education |
| Knapik <sup>67</sup> | 2010 | Randomized Controlled Trial         | Male/<br>Female | United States | Air Force         | Equipment                                                   |                                                    | - Involvement/Proximity of Experts      |
| Knapik <sup>68</sup> | 2010 | Systematic Review                   |                 | United States | Multiple Branches | NA                                                          |                                                    |                                         |
| Knapik <sup>69</sup> | 2010 | Randomized Controlled Trial         | Male            | United States | Marines           | Equipment                                                   |                                                    |                                         |
| Knapik <sup>70</sup> | 2014 | Systematic Review and Meta-analysis |                 | United States | Multiple Branches | NA                                                          |                                                    |                                         |
| Knapik <sup>71</sup> | 2019 | Narrative Review                    |                 | United States | Army              | NA                                                          | - Equipment-Related Factors<br>- Limited Resources | - Strong Stakeholder Engagement         |
| Knapik <sup>72</sup> | 2020 | Narrative Review                    |                 | United States | Army              | NA                                                          |                                                    |                                         |
| Kozinc <sup>73</sup> | 2017 | Systematic Review and Meta-analysis |                 |               | Multiple Branches | NA                                                          |                                                    |                                         |

|                        |      |                             |                 |               |                   |                                                                          |                                                                 |                                                    |
|------------------------|------|-----------------------------|-----------------|---------------|-------------------|--------------------------------------------------------------------------|-----------------------------------------------------------------|----------------------------------------------------|
| Lappe <sup>74</sup>    | 2008 | Randomized Controlled Trial | Female          | United States | Navy              | Nutrition/Supplement                                                     | - Equipment-Related Factors<br>- Lack of Stakeholder Engagement | - Involvement/Proximity of Experts<br>- Low Burden |
| Larsen <sup>75</sup>   | 2002 | Randomized Controlled Trial | Male            | Denmark       | Army              | Adding an Exercise Intervention                                          | -Lack of Stakeholder Engagement                                 |                                                    |
| Larsen <sup>76</sup>   | 2002 | Randomized Controlled Trial | Male/<br>Female | Denmark       | Army              | Equipment                                                                | - Limited Resources                                             |                                                    |
| Larsson <sup>77</sup>  | 2012 | Randomized Controlled Trial | Male            | Sweden        | Army              | Combination: Screening and Referral, Modified Existing Physical Training |                                                                 | - Involvement/Proximity of Experts                 |
| Lawley <sup>78</sup>   | 2020 | Narrative Review            |                 | United States | Multiple Branches | NA                                                                       |                                                                 |                                                    |
| Lee <sup>79</sup>      | 1997 | Randomized Controlled Trial | Male            | Singapore     | Army              | Adding an Exercise Intervention                                          |                                                                 |                                                    |
| Luippold <sup>80</sup> | 2011 | Prospective Cohort Study    | Male            | United States | Army              | Equipment                                                                |                                                                 |                                                    |
| Mattila <sup>81</sup>  | 2011 | Randomized Controlled Trial | Male            | Finland       | Army              | Equipment                                                                |                                                                 |                                                    |
| Mattila <sup>82</sup>  | 2011 | Randomized Controlled Trial | Male            | Finland       | Army              | Equipment                                                                |                                                                 |                                                    |
| McDevitt <sup>83</sup> | 2004 | Randomized Controlled Trial | Male            | United States | Multiple Branches | Equipment                                                                |                                                                 | - Emphasizing End-User Acceptability               |
| McGinnis <sup>84</sup> | 2019 | Randomized Controlled Trial | Male/<br>Female | United States | Army              | Nutrition/Supplement                                                     |                                                                 |                                                    |
| Milgrom <sup>85</sup>  | 1985 | Quasi-Experimental          | Male            | Israel        | Army              | Equipment                                                                |                                                                 |                                                    |
| Milgrom <sup>86</sup>  | 2004 | Randomized Controlled Trial | Male            | Israel        | Army              | Pharmacological                                                          | - Competing Military Priorities<br>- Equipment-Related Factors  |                                                    |
| Milgrom <sup>87</sup>  | 2005 | Randomized Controlled Trial | Male            | Israel        | Army              | Equipment                                                                | - Equipment-Related Factors                                     | - Emphasizing End-User Acceptability               |
| Milgrom <sup>88</sup>  | 2017 | Prospective Cohort          | Male            | Israel        | Army              | Modifying Existing Physical Training                                     | -Competing Military Priorities                                  |                                                    |
| Moer <sup>89</sup>     | 2009 | Narrative Review            |                 | Netherlands   | Multiple Branches | NA                                                                       |                                                                 |                                                    |

|                           |      |                                     |                 |               |                   |                                               |                                  |                                                                       |
|---------------------------|------|-------------------------------------|-----------------|---------------|-------------------|-----------------------------------------------|----------------------------------|-----------------------------------------------------------------------|
| Molloy <sup>90</sup>      | 2020 | Narrative Review                    |                 | United States | Army              | NA                                            |                                  |                                                                       |
| Mundermann <sup>91</sup>  | 2001 | Randomized Controlled Trial         | Male/<br>Female | Canada        | Multiple Branches | Equipment                                     |                                  | - Emphasizing End-User Acceptability                                  |
| Murray <sup>92</sup>      | 2015 | Randomized Controlled Trial         | Male/<br>Female | Denmark       | Air Force         | Adding an Exercise Intervention               | - Lack of Stakeholder Engagement |                                                                       |
| Newman <sup>93</sup>      | 2017 | Systematic Review and Meta-analysis |                 | United States | Multiple Branches | NA                                            |                                  |                                                                       |
| O'Connor <sup>94</sup>    | 2020 | Narrative Review                    |                 | United States | Air Force         | NA                                            |                                  |                                                                       |
| Olmsted <sup>95</sup>     | 2004 | Narrative Review                    |                 | United States | Multiple Branches | NA                                            | - Limited Resources              |                                                                       |
| Paradise <sup>96</sup>    | 2021 | Systematic Review                   |                 | United States | Multiple Branches | NA                                            |                                  |                                                                       |
| Parkkari <sup>97</sup>    | 2011 | Randomized Controlled Trial         | Male            | Finland       | Multiple Branches | Combination: Exercise Intervention, Education |                                  | - Strong Stakeholder Engagement<br>- Targeted Design of MSK-IMPP      |
| Pester <sup>98</sup>      | 1992 | Prospective Cohort                  | Male            | United States | Army              | Modifying Existing Physical Training          |                                  |                                                                       |
| Pihlajamäki <sup>99</sup> | 2006 | Retrospective Cohort                | Male            | Finland       | Multiple Branches | Education                                     |                                  | - Involvement/Proximity of Experts                                    |
| Pope <sup>100</sup>       | 1998 | Quasi-Experimental                  | Male            | Australia     | Army              | Adding an Exercise Intervention               |                                  | - Involvement/Proximity of Experts<br>- Strong Stakeholder Engagement |
| Pope <sup>101</sup>       | 1999 | Retrospective Cohort                | Female          | Australia     | Army              | Modifying Existing Physical Training          |                                  | - Emphasizing End-User Acceptability                                  |
| Pope <sup>102</sup>       | 2000 | Randomized Controlled Trial         | Male            | Australia     | Army              | Adding an Exercise Intervention               |                                  | - Involvement/Proximity of Experts                                    |
| Pope <sup>103</sup>       | 2002 | Retrospective Cohort                | Male/<br>Female | Australia     | Army              | Equipment                                     |                                  |                                                                       |
| Popovich <sup>104</sup>   | 2000 | Quasi-Experimental                  | Male            | United States | Army              | Modifying Existing Physical Training          |                                  |                                                                       |



|                           |      |                                  |                 |                              |                   |                                      |                                                                     |                                                                            |
|---------------------------|------|----------------------------------|-----------------|------------------------------|-------------------|--------------------------------------|---------------------------------------------------------------------|----------------------------------------------------------------------------|
| Robitaille <sup>105</sup> | 2021 | Feasibility Implementation Study | Male/<br>Female | Canada                       | Army              | Modifying Existing Physical Training | - Competing Military Priorities                                     | - Strong Stakeholder Engagement                                            |
| Rome <sup>106</sup>       | 2005 | Narrative Review                 |                 | New Zealand , United Kingdom | Army              | NA                                   | - Equipment-Related Factors<br>- Limited Resources                  | - Strong Stakeholder Engagement                                            |
| Roos <sup>107</sup>       | 2015 | Prospective Cohort               | Male            | Switzerland                  | Army              | Modifying Existing Physical Training |                                                                     | - Proximity and Continued Engagement with MSK-IMPP Experts                 |
| Ross <sup>108</sup>       | 1993 | Narrative Review                 |                 | United States                | Army              | NA                                   |                                                                     |                                                                            |
| Ross <sup>109</sup>       | 2002 | Retrospective Cohort             | Male            | United Kingdom               | Marines           | Modifying Existing Physical Training | - Competing Military Priorities                                     |                                                                            |
| Rudzki <sup>110</sup>     | 1997 | Randomized Controlled Trial      | Male            | Australia                    | Army              | Modifying Existing Physical Training | - Competing Military Priorities<br>- Lack of Stakeholder Engagement | - Strong Stakeholder Engagement                                            |
| Rudzki <sup>111</sup>     | 1999 | Quasi-Experimental               | Male            | Australia                    | Army              | Modifying Existing Physical Training | -Competing Military Priorities                                      |                                                                            |
| Schmidt <sup>112</sup>    | 2005 | Retrospective Cohort             | Male            | United States                | Army              | Equipment                            |                                                                     | - Targeted Design of MSK-IMPP                                              |
| Schumacher <sup>113</sup> | 2000 | Retrospective Cohort             | Male            | United States                | Army              | Equipment                            | - Equipment-Related Factors                                         |                                                                            |
| Schwellnus <sup>114</sup> | 1990 | Randomized Controlled Trial      | Male            | South Africa                 | Army              | Equipment                            |                                                                     |                                                                            |
| Scott <sup>115</sup>      | 2012 | Prospective Cohort Study         | Male/<br>Female | United States                | Army              | Education                            | -Limited Resources                                                  | - Providing Injury Mitigation Education<br>- Strong Stakeholder Engagement |
| Sell <sup>116</sup>       | 2016 | Prospective Cohort               | Male            | United States                | Army              | Modifying Existing Physical Training |                                                                     | - Targeted Design of MSK-IMPP                                              |
| Shaffer <sup>117</sup>    | 2006 | Narrative Review                 |                 | United States                | Multiple Branches | NA                                   |                                                                     |                                                                            |
| Sharma <sup>118</sup>     | 2014 | Randomized Controlled Trial      | Male            | United Kingdom               | Army              | Adding an Exercise Intervention      | -Limited Resources                                                  |                                                                            |

|                          |      |                             |      |                             |                   |                                 |  |                                                                            |
|--------------------------|------|-----------------------------|------|-----------------------------|-------------------|---------------------------------|--|----------------------------------------------------------------------------|
| Sheffield <sup>119</sup> | 1962 | Quasi-Experimental          | Male | United States               | Multiple Branches | Adding an Exercise Intervention |  |                                                                            |
| Sherrard <sup>120</sup>  | 2004 | Narrative Review            |      | Australia                   | Multiple Branches | NA                              |  | - Strong Stakeholder Engagement                                            |
| Shumway <sup>121</sup>   | 2016 | Prospective Cohort          | Male | United States               | Air Force         | Adding an Exercise Intervention |  | - Strong Stakeholder Engagement                                            |
| Simkin <sup>122</sup>    | 1989 | Prospective Cohort          | Male | Israel                      | Army              | Equipment                       |  |                                                                            |
| Sitler <sup>123</sup>    | 1990 | Randomized Controlled Trial | Male | United States               | Army              | Equipment                       |  |                                                                            |
| Sivakumar <sup>124</sup> | 2019 | Systematic Review           |      | Canada                      | Multiple Branches | NA                              |  |                                                                            |
| Slater <sup>125</sup>    | 2009 | Randomized Controlled Trial | Male | United States               | Navy              | Education                       |  | - Low Burden on Resources                                                  |
| Smith <sup>126</sup>     | 1985 | Randomized Controlled Trial | Male | United States               | Coast Guard       | Equipment                       |  |                                                                            |
| Steinberg <sup>127</sup> | 2021 | Randomized Controlled Trial | Male | Israel                      | Army              | Adding an Exercise Intervention |  | - Strong Stakeholder Engagement                                            |
| Suni <sup>128</sup>      | 2013 | Randomized Controlled Trial | Male | Finland                     | Army              | Adding an Exercise Intervention |  | - Providing Injury Mitigation Education<br>- Targeted Design of MSK-IMPP   |
| Thacker <sup>129</sup>   | 2002 | Systematic Review           |      | United States, South Africa | Multiple Branches | NA                              |  | - Emphasizing End-User Acceptability<br>- Involvement/Proximity of Experts |

|                            |      |                             |                 |                  |                   |                                 |                                |                                                                      |
|----------------------------|------|-----------------------------|-----------------|------------------|-------------------|---------------------------------|--------------------------------|----------------------------------------------------------------------|
| VanTiggelen <sup>130</sup> | 2004 | Randomized Controlled Trial | Male/<br>Female | Belgium          | Multiple Branches | Equipment                       |                                |                                                                      |
| Withnall <sup>131</sup>    | 2006 | Randomized Controlled Trial | Male/<br>Female | United Kingdom   | Air Force         | Equipment                       | - Limited Resources            |                                                                      |
| Yeung <sup>132</sup>       | 2001 | Systematic Review           |                 | United States    | Multiple Branches | NA                              |                                | - Strong Stakeholder Engagement                                      |
| Yeung <sup>133</sup>       | 2001 | Narrative Review            |                 | Hong Kong, China | Multiple Branches | NA                              |                                |                                                                      |
| Zeng <sup>134</sup>        | 2021 | Randomized Controlled Trial | Male            | China            | Army              | Adding an Exercise Intervention | -Competing Military Priorities |                                                                      |
| Ziemke <sup>135</sup>      | 2001 | Narrative Review            |                 | United States    | Navy              | NA                              |                                | - Involvement/Proximity of Experts<br>-Strong Stakeholder Engagement |
| Zimmermann <sup>136</sup>  | 2017 | Narrative Review            |                 | Netherlands      | Multiple Branches | NA                              | - Limited Resources            |                                                                      |

**\*If no barriers or facilitators are reported in the table, no barriers or facilitators were reported in the article.**

## References

1. van Mechelen W. Sports injury surveillance systems. *Sports medicine* 1997;24(3):164-68. doi: 10.2165/00007256-199724030-00003
2. van Mechelen W, Hlobil H, Kemper HC. Incidence, severity, aetiology and prevention of sports injuries. *Sports medicine* 1992;14(2):82-99. doi: 10.2165/00007256-199214020-00002
3. Pless I, Hagel B. Injury prevention: a glossary of terms. *Journal of epidemiology and community health* 2005;59(3):182. doi: 10.1136/jech.2003.017715
4. Aaltonen S, Karjalainen H, Heinonen A, et al. Prevention of sports injuries: systematic review of randomized controlled trials. *Archives of internal medicine* 2007;167(15):1585-92.
5. Alricsson M, Harms-Ringdahl K, Larsson B, et al. Neck muscle strength and endurance in fighter pilots: effects of a supervised training program. *Aviation, space, and environmental medicine* 2004;75(1):23-28.
6. Amako M, Oda T, Masuoka K, et al. Effect of static stretching on prevention of injuries for military recruits. *Military medicine* 2003;168(6):442-46. doi: 10.1093/milmed/168.6.442
7. Amoroso PJ, Ryan JB, Bickley B, et al. Braced for impact: reducing military paratroopers' ankle sprains using outside-the-boot braces. *Journal of Trauma and Acute Care Surgery* 1998;45(3):575-80. doi: 10.1097/00005373-199809000-00028
8. Andersen KA, Grimshaw PN, Kelso RM, et al. Musculoskeletal lower limb injury risk in army populations. *Sports medicine-open* 2016;2(1):22. doi: 10.1186/s40798-016-0046-z
9. Äng BO, Monnier A, Harms-Ringdahl K. Neck/shoulder exercise for neck pain in air force helicopter pilots: a randomized controlled trial. *Spine* 2009;34(16):E544-E51. doi: 10.1097/BRS.0b013e3181aa6870
10. Aronen JG, Regan K. Decreasing the incidence of recurrence of first time anterior shoulder dislocations with rehabilitation. *The American journal of sports medicine* 1984;12(4):283-91. doi: 10.1177/036354658401200408
11. Arslan IG, Dijkstra I, van Etten-Jamaludin FS, et al. Nonexercise interventions for prevention of musculoskeletal injuries in armed forces: a systematic review and meta-analysis. *American journal of preventive medicine* 2021;60(2):e73-e84. doi: 10.1016/j.amepre.2020.08.007
12. Barnes KR, Tchandja JN, Webber BJ, et al. The Effects of Prenatal Vitamin Supplementation on Operationally Significant Health Outcomes in Female Air Force Trainees. *Military Medicine* 2015;180(5):554-58. doi: 10.7205/MILMED-D-14-00258
13. Baxter ML, Baycroft C, Baxter GD. Lower Limb Injuries in Soldiers: Feasibility of Reduction Through Implementation of a Novel Orthotic Screening Protocol. *Military Medicine* 2011;176(3):291-96. doi: 10.7205/MILMED-D-10-00352
14. Baxter ML, Ribeiro DC, Milosavljevic S. Do orthotics work as an injury prevention strategy for the military? *Physical Therapy Reviews* 2012;17(4):241-51. doi: 10.1179/1743288X12Y.0000000013
15. Berg Rice VJ, Pekarek D, Connolly V, et al. Participatory ergonomics: determining injury control "buy-in" of US Army cadre. *Work* 2002;18(2):191-203. [published Online First: 2002/11/21]
16. Berg Rice VJ, Connolly VL, Pritchard A, et al. Effectiveness of a screening tool to detect injuries during Army Health Care Specialist training. *Work* 2007;29(3):177-88. [published Online First: 2007/10/19]

17. Bonanno DR, Murley GS, Munteanu SE, et al. Effectiveness of foot orthoses for the prevention of lower limb overuse injuries in naval recruits: a randomised controlled trial. *British Journal of Sports Medicine* 2018;52(5):298. doi: 10.1136/bjsports-2017-098273
18. Brushøj C, Larsen K, Albrecht-Beste E, et al. Prevention of overuse injuries by a concurrent exercise program in subjects exposed to an increase in training load: a randomized controlled trial of 1020 army recruits. *Am J Sports Med* 2008;36(4):663-70. doi: 10.1177/0363546508315469 [published Online First: 2008/03/14]
19. Bullock SH, Jones BH, Gilchrist J, et al. Prevention of Physical Training–Related Injuries: Recommendations for the Military and Other Active Populations Based on Expedited Systematic Reviews. *American Journal of Preventive Medicine* 2010;38(1, Supplement):S156-S81. doi: 10.1016/j.amepre.2009.10.023
20. Burgess JE. Analysis of Y Listings and Medical Discharges of Officer Cadets at RMAS from January 1994 to May 1997, with Actions to Prevent Injuries. *Journal of the Royal Army Medical Corps* 1998;144(3):152-55. doi: 10.1136/jramc-144-03-07
21. Cameron KL, Owens BD. The burden and management of sports-related musculoskeletal injuries and conditions within the US military. *Clin Sports Med* 2014;33(4):573-89. doi: 10.1016/j.csm.2014.06.004
22. Cancelliere C, Sutton D, Cote P, et al. Implementation interventions for musculoskeletal programs of care in the active military and barriers, facilitators, and outcomes of implementation: a scoping review. *Implementation science : IS* 2019;14(1):82-82. doi: 10.1186/s13012-019-0931-1
23. Carow SD, Haniuk EM, Cameron KL, et al. Risk of Lower Extremity Injury in a Military Cadet Population After a Supervised Injury-Prevention Program. *J Athl Train* 2016;51(11):905-18. doi: 10.4085/1062-6050-49.5.22
24. Chalupa RL, Aberle C, Johnson AE. Observed rates of lower extremity stress fractures after implementation of the army physical readiness training program at JBSA Fort SAM Houston. *US Army Medical Department Journal*, 2016:6-10.
25. Childs JD, Teyhen DS, Casey PR, et al. Effects of Traditional Sit-up Training Versus Core Stabilization Exercises on Short-Term Musculoskeletal Injuries in US Army Soldiers: A Cluster Randomized Trial. *Physical Therapy* 2010;90(10):1404-12. doi: 10.2522/ptj.20090389
26. Childs JD, Wu SS, Teyhen DS, et al. Prevention of low back pain in the military cluster randomized trial: effects of brief psychosocial education on total and low back pain-related health care costs. *Spine J* 2014;14(4):571-83. doi: 10.1016/j.spinee.2013.03.019 [published Online First: 2013/04/24]
27. Coakwell MR, Bloswick DS, Moser R. High-risk head and neck movements at high G and interventions to reduce associated neck injury. *Aviation, space, and environmental medicine* 2004;75(1):68-80.
28. Constantini N, Finestone AS, Hod N, et al. Equipment Modification Is Associated With Fewer Stress Fractures in Female Israel Border Police Recruits. *Military Medicine* 2010;175(10):799-804. doi: 10.7205/MILMED-D-09-00253
29. Coppack RJ, Etherington J, Wills AK. The Effects of Exercise for the Prevention of Overuse Anterior Knee Pain: A Randomized Controlled Trial. *The American journal of sports medicine* 2011;39(5):940-48. doi: 10.1177/0363546510393269
30. Dawson GM, Broad R, Orr RM. The impact of a lengthened Australian Army recruit training course on recruit injuries. *Journal of Military and Veterans Health* 2015;23(2):14-19.

31. Dettori JR, Bullock SH, Sutlive TG, et al. The effects of spinal flexion and extension exercises and their associated postures in patients with acute low back pain. *Spine* 1995;20(21):2303-12. doi: 10.1097/00007632-199511000-00008
32. Dijkma I, Perry S, Zimmermann W, et al. Effects of agility training on body control, change of direction speed and injury attrition rates in Dutch recruits: a pilot study. *Journal of Military and Veterans Health* 2019;27(2):28-40.
33. Dijkma I, Zimmermann WO, Bovens D, et al. Despite an improved aerobic endurance, still high attrition rates in initially low-fit recruits-results of a randomised controlled trial. *Contemp Clin Trials Commun* 2020;20:100679. doi: 10.1016/j.conctc.2020.100679 [published Online First: 2021/06/08]
34. Dijkma I, Arslan IG, Etten-Jamaludin FS, et al. Exercise Programs to Reduce the Risk of Musculoskeletal Injuries in Military Personnel: A Systematic Review and Meta-Analysis. *PM & R* 2020;12(10):1028-37. doi: 10.1002/pmrj.12360
35. Esterman A, Pilotto L. Foot shape and its effect on functioning in Royal Australian Air Force recruits. Part 2: Pilot, randomized, controlled trial of orthotics in recruits with flat feet. *Military medicine* 2005;170(7):629-33. doi: 10.7205/MILMED.170.7.629
36. Finestone A, Shlamkovitch N, Eldad A, et al. A prospective study of the effect of the appropriateness of foot-shoe fit and training shoe type on the incidence of overuse injuries among infantry recruits. *Military medicine* 1992;157(9):489-90. doi: 10.1093/milmed/157.9.489
37. Finestone A, Giladi M, Elad H, et al. Prevention of stress fractures using custom biomechanical shoe orthoses. *Clinical Orthopaedics and Related Research*® 1999;360:182-90. doi: 10.1097/00003086-199903000-00022
38. Finestone A, Novack V, Farfel A, et al. A prospective study of the effect of foot orthoses composition and fabrication on comfort and the incidence of overuse injuries. *Foot & ankle international* 2004;25(7):462-66. doi: 10.1177/107110070402500704
39. Finestone A, Milgrom C. How stress fracture incidence was lowered in the Israeli army: a 25-yr struggle. *Med Sci Sports Exerc* 2008;40(11 Suppl):S623-9. doi: 10.1249/MSS.0b013e3181892dc2
40. Fisher R, Esparza S, Nye NS, et al. Outcomes of Embedded Athletic Training Services Within United States Air Force Basic Military Training. *J Athl Train* 2021;56(2):134-40. doi: 10.4085/1062-6050-0498.19
41. Franklyn-Miller A, Wilson C, Bilzon J, et al. Foot Orthoses in the Prevention of Injury in Initial Military Training: A Randomized Controlled Trial. *The American journal of sports medicine* 2011;39(1):30-37. doi: 10.1177/0363546510382852
42. Gardner Jr. LI, Dziados JE, Jones BH, et al. Prevention of lower extremity stress fractures: a controlled trial of a shock absorbent insole. *American journal of public health* 1988;78(12):1563-67. doi: 10.2105/AJPH.78.12.1563
43. George SZ, Childs JD, Teyhen DS, et al. Brief psychosocial education, not core stabilization, reduced incidence of low back pain: results from the Prevention of Low Back Pain in the Military (POLM) cluster randomized trial. *BMC Med* 2011;9:128. doi: 10.1186/1741-7015-9-128 [published Online First: 20111129]
44. Gillespie WJ, Grant I. Interventions for preventing and treating stress fractures and stress reactions of bone of the lower limbs in young adults. *Cochrane Database Syst Rev* 2000(2):CD000450. doi: 10.1002/14651858.CD000450

45. Goodall RL, Pope RP, Coyle JA, et al. Balance and agility training does not always decrease lower limb injury risks: a cluster-randomised controlled trial. *International Journal of Injury Control and Safety Promotion* 2013;20(3):271-81. doi: 10.1080/17457300.2012.717085
46. Grier TL, Knapik JJ, Swedler D, et al. Footwear in the United States Army Band: Injury incidence and risk factors associated with foot pain. *Foot (Edinburgh, Scotland)* 2011;21(2):60-65. doi: 10.1016/j.foot.2010.12.002
47. Grier T, Anderson MK, Depenbrock P, et al. Evaluation of the US Army Special Forces Tactical Human Optimization, Rapid Rehabilitation, and Reconditioning Program. *Journal of special operations medicine* 2018;18(2):42-48. doi: 10.55460/ZMF1-LOAH
48. Gross MT, Liu HY. The role of ankle bracing for prevention of ankle sprain injuries. *J Orthop Sports Phys Ther* 2003;33(10):572-7. doi: 10.2519/jospt.2003.33.10.572 [published Online First: 2003/11/19]
49. Hartig DE, Henderson JM. Increasing hamstring flexibility decreases lower extremity overuse injuries in military basic trainees. *The American journal of sports medicine* 1999;27(2):173-76.
50. Heard C, Willcox M, Falvo M, et al. Effects of linear periodization training on performance gains and injury prevention in a garrisoned military unit. *Journal of Military and Veterans Health* 2020;28(3):23-34.
51. Herbert RD, Gabriel M. Effects of stretching before and after exercising on muscle soreness and risk of injury: systematic review. *BMJ* 2002;325(7362):468-70. doi: 10.1136/bmj.325.7362.468
52. Herman K, Barton C, Malliaras P, et al. The effectiveness of functional neuromuscular warm-up strategies for preventing Lower Limb Injuries during sports participation: a systematic review. *Muscles, Ligaments & Tendons Journal (MLTJ)* 2012 doi: 10.1186/1741-7015-10-75
53. Herman K, Barton C, Malliaras P, et al. The effectiveness of neuromuscular warm-up strategies, that require no additional equipment, for preventing lower limb injuries during sports participation: a systematic review. *BMC Medicine* 2012;10(1):75. doi: 10.1186/1741-7015-10-75
54. Hesarikia H, Nazemian SS, Rasouli HR, et al. Effect of foot orthoses on ankle and foot injuries in military service recruits: a randomized controlled trial. *Biosciences Biotechnology Research Asia* 2014;11(3):1141-48. doi: 10.13005/bbra/1499
55. House C, Reece A, Roiz de Sa D. Shock-Absorbing Insoles Reduce the Incidence of Lower Limb Overuse Injuries Sustained During Royal Marine Training. *Military Medicine* 2013;178(6):683-89. doi: 10.7205/MILMED-D-12-00361
56. Jones BH, Knapik JJ. Physical training and exercise-related injuries. Surveillance, research and injury prevention in military populations. *Sports Med* 1999;27(2):111-25. doi: 10.2165/00007256-199927020-00004 [published Online First: 1999/03/26]
57. Jones BH, Thacker SB, Gilchrist J, et al. Prevention of Lower Extremity Stress Fractures in Athletes and Soldiers: A Systematic Review. *Epidemiologic Reviews* 2002;24(2):228-47. doi: 10.1093/epirev/mxf011
58. Jones BH, Hauschild VD. Physical Training, Fitness, and Injuries: Lessons Learned From Military Studies. *Journal of strength and conditioning research* 2015;29 Suppl 11(11):S57-S64. doi: 10.1519/JSC.0000000000001115



59. Knapik JJ, McCollam R, Canham-Chervak M, et al. Injuries and injury prevention among senior military officers at the Army War College. *Military medicine* 2002;167(7):593-99. doi: 10.1093/milmed/167.6.593
60. Knapik JJ, Hauret KG, Arnold S, et al. Injury and fitness outcomes during implementation of physical readiness training. *International journal of sports medicine* 2003;24(5):372. doi: 10.1055/s-2003-40710
61. Knapik JJ, Bullock SH, Canada S, et al. Influence of an injury reduction program on injury and fitness outcomes among soldiers. *Inj Prev* 2004;10(1):37-42. doi: 10.1136/ip.2003.002808 [published Online First: 2004/02/05]
62. Knapik JJ, Darakjy S, Scott SJ, et al. Evaluation of a standardized physical training program for basic combat training. *Journal of strength and conditioning research* 2005;19(2):246. doi: 10.1519/16324.1
63. Knapik JJ, Darakjy S, Hauret KG, et al. Increasing the physical fitness of low-fit recruits before basic combat training: an evaluation of fitness, injuries, and training outcomes. *Mil Med* 2006;171(1):45-54. doi: 10.7205/milmed.171.1.45 [published Online First: 2006/03/15]
64. Knapik JJ, Spiess A, Swedler D, et al. Injury risk factors in parachuting and acceptability of the parachute ankle brace. *Aviat Space Environ Med* 2008;79(7):689-94. doi: 10.3357/ASEM.2273.2008 [published Online First: 2008/07/16]
65. Knapik JJ, Swedler DI, Grier TL, et al. Injury reduction effectiveness of selecting running shoes based on plantar shape. *The Journal of Strength & Conditioning Research* 2009;23(3):685-97. doi: 10.1519/JSC.0b013e3181a0fc63
66. Knapik JJ, Rieger W, Palkoska F, et al. United States Army physical readiness training: rationale and evaluation of the physical training doctrine. *The Journal of Strength & Conditioning Research* 2009;23(4):1353-62. doi: 10.1519/JSC.0b013e318194df72
67. Knapik JJ, Brosch LC, Venuto M, et al. Effect on injuries of assigning shoes based on foot shape in air force basic training. *American journal of preventive medicine* 2010;38(1):S197-S211. doi: 10.1016/j.amepre.2009.10.013
68. Knapik JJ, Spiess A, Swedler DI, et al. Systematic review of the parachute ankle brace: injury risk reduction and cost effectiveness. *Am J Prev Med* 2010;38(1 Suppl):S182-8. doi: 10.1016/j.amepre.2009.10.012 [published Online First: 2010/02/13]
69. Knapik JJ, Trone DW, Swedler DI, et al. Injury Reduction Effectiveness of Assigning Running Shoes Based on Plantar Shape in Marine Corps Basic Training. *The American Journal of Sports Medicine* 2010;38(9):1759-67. doi: 10.1177/0363546510369548
70. Knapik JJ, Trone DW, Tchandja J, et al. Injury-reduction effectiveness of prescribing running shoes on the basis of foot arch height: summary of military investigations. *J Orthop Sports Phys Ther* 2014;44(10):805-12. doi: 10.2519/jospt.2014.5342 [published Online First: 2014/08/27]
71. Knapik JJ. United States Military Parachute Injuries: Part 2: Interventions Reducing Military Parachute Injuries in Training and Operations. *Journal of special operations medicine* 2019;19(4):109-13. doi: 10.55460/F7WX-VUG8
72. Knapik JJ, Pope R. Achilles Tendinopathy: Pathophysiology, Epidemiology, Diagnosis, Treatment, Prevention, and Screening. *Journal of special operations medicine* 2020;20(1):125-40. doi: 10.55460/QXTX-A72P



73. Kozinc Ž, Šarabon N. Effectiveness of Movement Therapy Interventions and Training Modifications for Preventing Running Injuries: A Meta-Analysis of Randomized Controlled Trials. *Journal of sports science & medicine* 2017;16(3):421-28.
74. Lappe J, Cullen D, Haynatzki G, et al. Calcium and vitamin D supplementation decreases incidence of stress fractures in female navy recruits. *Journal of Bone and Mineral Research* 2008;23(5):741-49. doi: 10.1359/jbmr.080102
75. Larsen K, Weidick F, Leboeuf-Yde C. Can passive prone extensions of the back prevent back problems? A randomized, controlled intervention trial of 314 military conscripts. *Spine (Philadelphia, Pa 1976)* 2002;27(24):2747-52. doi: 10.1097/00007632-200212150-00002
76. Larsen K, Weidich F, Leboeuf-Yde C. Can custom-made biomechanic shoe orthoses prevent problems in the back and lower extremities? A randomized, controlled intervention trial of 146 military conscripts. *Journal of manipulative and physiological therapeutics* 2002;25(5):326-31. doi: 10.1067/mmt.2002.124419
77. Larsson H, Tegern M, Harms-Ringdahl K. Influence of the implementation of a comprehensive intervention programme on premature discharge outcomes from military training. *Work* 2012;42(2):241-51. doi: 10.3233/wor-2012-1347 [published Online First: 2012/06/16]
78. Lawley R, Syrop IP, Fredericson M. Vitamin D for improved bone health and prevention of stress fractures: A review of the literature. *Current Sports Medicine Reports* 2020;19(6):202-08.
79. Lee L, Kumar S, Kok W, et al. Effects of a pre-training conditioning programme on basic military training attrition rates. *Annals of the Academy of Medicine, Singapore* 1997;26(1):3-7.
80. Luippold RS, Sulsky SI, Amoroso PJ. Effectiveness of an external ankle brace in reducing parachuting-related ankle injuries. *Injury prevention* 2011;17(1):58-61. doi: 10.1136/ip.2009.025981
81. Mattila VM, Sillanpää PJ, Salo T, et al. Orthotic insoles do not prevent physical stress-induced low back pain. *European Spine Journal* 2011;20(1):100-04. doi: 10.1007/s00586-010-1496-5
82. Mattila VM, Sillanpää PJ, Salo T, et al. Can orthotic insoles prevent lower limb overuse injuries? A randomized-controlled trial of 228 subjects. *Scandinavian journal of medicine & science in sports* 2011;21(6):804-08. doi: 10.1111/j.1600-0838.2010.01116.x [published Online First: Accepted for publication 7 January 2010]
83. McDevitt ER, Taylor DC, Miller MD, et al. Functional bracing after anterior cruciate ligament reconstruction: a prospective, randomized, multicenter study. *The American journal of sports medicine* 2004;32(8):1887-92. doi: 10.1177/0363546504265998
84. McGinnis KD, McAdam JS, Lockwood CM, et al. Impact of Protein and Carbohydrate Supplementation on Musculoskeletal Injuries in Army Initial Entry Training Soldiers. *Nutrients* 2018;10(12):1938. doi: 10.3390/nu10121938
85. Milgrom C, Giladi M, Kashtan H, et al. A prospective study of the effect of a shock-absorbing orthotic device on the incidence of stress fractures in military recruits. *Foot & ankle* 1985;6(2):101-04. doi: 10.1177/107110078500600209
86. Milgrom C, Finestone A, Novack V, et al. The effect of prophylactic treatment with risedronate on stress fracture incidence among infantry recruits. *Bone* 2004;35(2):418-24.

87. Milgrom C, Finestone A, Lubovsky O, et al. A controlled randomized study of the effect of training with orthoses on the incidence of weight bearing induced back pain among infantry recruits. *Spine* 2005;30(3):272-75. doi: 10.1097/01.brs.0000152163.97314.d0
88. Milgrom C, Finestone AS. The effect of stress fracture interventions in a single elite infantry training unit (1983–2015). *Bone* 2017;103:125-30. doi: 10.1016/j.bone.2017.06.026
89. Moen MH, Tol JL, Weir A, et al. Medial Tibial Stress Syndrome: A Critical Review. *Sports medicine (Auckland)* 2009;39(7):523-46. doi: 10.2165/00007256-200939070-00002
90. Molloy JM, Pendergrass TL, Lee IE, et al. Musculoskeletal Injuries and United States Army Readiness. Part II: Management Challenges and Risk Mitigation Initiatives. *Military medicine* 2020;185(9-10):e1472-e80. doi: 10.1093/milmed/usaa028
91. Mundermann A, Stefanyshyn DJ, Nigg BM. Relationship between footwear comfort of shoe inserts and anthropometric and sensory factors. *Medicine and science in sports and exercise* 2001;33(11):1939-45. doi: 10.1097/00005768-200111000-00021
92. Murray M, Lange B, Nørnberg BR, et al. Specific exercise training for reducing neck and shoulder pain among military helicopter pilots and crew members: a randomized controlled trial protocol. *BMC musculoskeletal disorders* 2015;16(1):1-11. doi: 10.1186/s12891-015-0655-6
93. Newman TM, Gay MR, Buckley WE. Prophylactic Ankle Bracing in Military Settings: A Review of the Literature. *Military medicine* 2017;182(3):e1596-e602. doi: 10.7205/MILMED-D-16-00160
94. O’Conor DK, Dalal S, Ramachandran V, et al. Crew-Friendly Countermeasures Against Musculoskeletal Injuries in Aviation and Spaceflight. *Frontiers in physiology* 2020;11:837-37. doi: 10.3389/fphys.2020.00837
95. Olmsted LC, Vela LI, Denegar CR, et al. Prophylactic Ankle Taping and Bracing: A Numbers-Needed-to-Treat and Cost-Benefit Analysis. *J Athl Train* 2004;39(1):95-100.
96. Paradise SL, Beer JR, Cruz CA, et al. Prescribed footwear and orthoses are not prophylactic in preventing lower extremity injuries in military tactical athletes: a systematic review with meta-analysis. *BMJ military health* 2021:e001955. doi: 10.1136/bmjmilitary-2021-001955
97. Parkkari J, Taanila H, Suni J, et al. Neuromuscular training with injury prevention counselling to decrease the risk of acute musculoskeletal injury in young men during military service: a population-based, randomised study. *BMC medicine* 2011;9(1):35-35. doi: 10.1186/1741-7015-9-35
98. Pester S, Smith P. Stress fractures in the lower extremities of soldiers in basic training. *Orthopaedic review* 1992;21(3):297-303.
99. Pihlajamäki HK, Ruohola J-P, Kiuru MJ, et al. Displaced femoral neck fatigue fractures in military recruits. *JBJS* 2006;88(9):1989-97. doi: 10.2106/JBJS.E.00505
100. Pope R, Herbert R, Kirwan J. Effects of ankle dorsiflexion range and pre-exercise calf muscle stretching on injury risk in Army recruits. *Australian Journal of Physiotherapy* 1998;44(3):165-72. doi: 10.1016/S0004-9514(14)60376-7
101. Pope RP. Prevention of pelvic stress fractures in female army recruits. *Mil Med* 1999;164(5):370-3. doi: 10.1093/milmed/164.5.370 [published Online First: 1999/05/20]
102. Pope RP, Herbert RD, Kirwan JD, et al. A randomized trial of preexercise stretching for prevention of lower-limb injury. *Medicine and science in sports and exercise* 2000;32(2):271-77. doi: 10.1097/00005768-200002000-00004

103. Pope RP. Rubber Matting on an Obstacle Course Causes Anterior Cruciate Ligament Ruptures and Its Removal Eliminates Them. *Military Medicine* 2002;167(4):355-58. doi: 10.1093/milmed/167.4.355
104. Popovich RM, Gardner JW, Potter R, et al. Effect of rest from running on overuse injuries in army basic training. *American journal of preventive medicine* 2000;18(3):147-55. doi: 10.1016/S0749-3797(99)00167-1
105. Robitaille E, Larter V, Heipel S, et al. The feasibility of implementing an evidence-based physical training program during a Canadian Armed Forces basic infantry course. *J Sci Med Sport* 2021;24(9):886-93. doi: 10.1016/j.jsams.2021.03.012 [published Online First: 2021/04/19]
106. Rome K, Handoll HH, Ashford RL. Interventions for preventing and treating stress fractures and stress reactions of bone of the lower limbs in young adults. *Cochrane Database of Systematic Reviews* 2005(2) doi: 10.1002/14651858.CD000450.pub2
107. Roos L, Boesch M, Sefidan S, et al. Adapted marching distances and physical training decrease recruits' injuries and attrition. *Military medicine* 2015;180(3):329-36. doi: 10.7205/MILMED-D-14-00184
108. Ross J. A review of lower limb overuse injuries during basic military training. Part 2: Prevention of overuse injuries. *Military medicine* 1993;158(6):415-20. doi: 10.1093/milmed/158.6.415
109. Ross RA, Allsopp A. Stress Fractures in Royal Marines Recruits. *Military Medicine* 2002;167(7):560-65. doi: 10.1093/milmed/167.7.560
110. Rudzki SJ. Injuries in Australian Army recruits. Part I: Decreased incidence and severity of injury seen with reduced running distance. *Mil Med* 1997;162(7):472-6. doi: 10.1093/milmed/162.7.472 [published Online First: 1997/07/01]
111. Rudzki SJ, Cunningham MJ. The effect of a modified physical training program in reducing injury and medical discharge rates in Australian Army recruits. *Mil Med* 1999;164(9):648-52. doi: 10.1093/milmed/164.9.648 [published Online First: 1999/09/25]
112. Schmidt MD, Sulsky SI, Amoroso PJ. Effectiveness of an outside-the-boot ankle brace in reducing parachuting related ankle injuries. *Injury prevention* 2005;11(3):163-68. doi: 10.1136/ip.2004.006304
113. Schumacher Jr. JT, Creedon JF, Pope RW. The effectiveness of the parachutist ankle brace in reducing ankle injuries in an airborne ranger battalion. *Mil Med* 2000;165(12):944-8. doi: 10.1093/milmed/165.12.944 [published Online First: 2001/02/24]
114. Schweltnus MP, Jordaan G, Noakes TD. Prevention of common overuse injuries by the use of shock absorbing insoles: a prospective study. *The American journal of sports medicine* 1990;18(6):636-41. doi: 10.1177/036354659001800614
115. Scott SJ, Feltwell DN, Knapik JJ, et al. A Multiple Intervention Strategy for Reducing Femoral Neck Stress Injuries and Other Serious Overuse Injuries in U.S. Army Basic Combat Training. *Military Medicine* 2012;177(9):1081-89. doi: 10.7205/MILMED-D-12-00085
116. Sell TC, Abt JP, Nagai T, et al. The eagle tactical athlete program reduces musculoskeletal injuries in the 101st airborne division (air assault). *Military medicine* 2016;181(3):250-57. doi: 10.7205/MILMED-D-14-00674
117. Shaffer SW, Uhl TL. Preventing and treating lower extremity stress reactions and fractures in adults. *Journal of Athletic Training* 2006;41(4):466.

118. Sharma J, Weston M, Batterham AM, et al. Gait Retraining and Incidence of Medial Tibial Stress Syndrome in Army Recruits. *Medicine and science in sports and exercise* 2014;46(9):1684-92. doi: 10.1249/MSS.0000000000000290
119. Sheffield FJ. Low Back Pain—With an Approach Toward Prevention. *Military Medicine* 1962;127(3):232-35. doi: 10.1093/milmed/127.3.232
120. Sherrard J, Lenné M, Cassell E, et al. Injury prevention during physical activity in the Australian Defence Force. *J Sci Med Sport* 2004;7(1):106-17. doi: 10.1016/s1440-2440(04)80049-5 [published Online First: 2004/05/14]
121. Shumway JD, Anderson DN, Bishop B. Effectiveness of an Injury Prevention Warm-up for Unit Physical Training: A Case Series of Two Flying Squadrons. *Mil Med* 2016;181(5 Suppl):95-103. doi: 10.7205/MILMED-D-15-00190
122. Simkin A, Leichter I, Giladi M, et al. Combined effect of foot arch structure and an orthotic device on stress fractures. *Foot & ankle* 1989;10(1):25-29. doi: 10.1177/107110078901000105
123. Sitler M, Ryan CJ, Hopkinson LW, et al. The efficacy of a prophylactic knee brace to reduce knee injuries in football: A prospective, randomized study at West Point. *The American journal of sports medicine* 1990;18(3):310-15. doi: 10.1177/036354659001800315
124. Sivakumar G, Koziarz A, Farrokhyar F. Vitamin D supplementation in military personnel: A systematic review of randomized controlled trials. *Sports health* 2019;11(5):425-31.
125. Slater MA, Weickgenant AL, Greenberg MA, et al. Preventing Progression to Chronicity in First Onset, Subacute Low Back Pain: An Exploratory Study. *Archives of physical medicine and rehabilitation* 2009;90(4):545-52. doi: 10.1016/j.apmr.2008.10.032
126. Smith W, Walter J, Bailey M. Effects of insoles in coast guard basic training footwear. *Journal of the American Podiatric Medical Association* 1985;75(12):644-47. doi: 10.7547/87507315-75-12-644
127. Steinberg N, Bar-Sela S, Moran U, et al. Injury Prevention Exercises for Reduced Incidence of Injuries in Combat Soldiers. *Journal of strength and conditioning research* 2021;35(11):3128-38. doi: 10.1519/JSC.0000000000004053
128. Suni JH, Taanila H, Mattila VM, et al. Neuromuscular Exercise and Counseling Decrease Absenteeism Due to Low Back Pain in Young Conscripts: A Randomized, Population-Based Primary Prevention Study. *Spine* 2013;38(5) doi: 10.1097/BRS.0b013e318270a12d
129. Thacker SB, Gilchrist J, Stroup DF, et al. The prevention of shin splints in sports: a systematic review of literature. *Medicine & Science in Sports & Exercise* 2002;34(1):32-40. doi: 10.1097/00005768-200201000-00006
130. Van Tiggelen D, Witvrouw E, Roget P, et al. Effect of bracing on the prevention of anterior knee pain--a prospective randomized study. *Knee surgery, sports traumatology, arthroscopy : official journal of the ESSKA* 2004;12(5):434-39. doi: 10.1007/s00167-003-0479-z
131. Withnall R, Eastaugh J, Freemantle N. Do shock absorbing insoles in recruits undertaking high levels of physical activity reduce lower limb injury? A randomized controlled trial. *Journal of the Royal Society of Medicine* 2006;99(1):32-37.
132. Yeung EW, Yeung SS. A systematic review of interventions to prevent lower limb soft tissue running injuries. *British Journal of Sports Medicine* 2001;35(6):383. doi: 10.1136/bjism.35.6.383

133. Yeung EW, Yeung SS. Interventions for preventing lower limb soft-tissue injuries in runners. *Cochrane Database of Systematic Reviews* 2001(3) doi: 10.1002/14651858.CD001256
134. Zeng J, Zhang RB, Ke JJ, et al. Reliability evaluation of functional movement screen for prevention of military training injury: A prospective study in China. *Journal of occupational health* 2021;63(1):e12270-n/a. doi: 10.1002/1348-9585.12270
135. Ziemke GW, Koffman RL, Wood DP. "Tip of the Spear" Physical Therapy during a 6-Month Deployment to the Persian Gulf: A Preliminary Report. *Military medicine* 2001;166(6):505-09. doi: 10.1093/milmed/166.6.505
136. Zimmermann WO, Helmhout P, Beutler A. Prevention and treatment of exercise related leg pain in young soldiers; a review of the literature and current practice in the Dutch Armed Forces. *BMJ Military Health* 2017;163(2):94-103. doi: 10.1136/jramc-2016-000635
